# Supplementary material for: Reduced levels of CCL2 and CXCL10 in systemic lupus erythematosus patients under treatment with prednisone, mycophenolate mofetil, or hydroxychloroquine, except in a high STAT1 subset
Source: PubMed Central journal article supplement (PMC3978465; doi:10.1186/ar4451), 2014-01-24
Supplement: ar4451-S1.pdf [file ar4451-S1.pdf]

# **Reduced levels of CCL2 and CXCL10 in SLE patients under treatment with prednisone, mycophenolate mofetil, or hydroxychloroquine, except in a high STAT1 subset**

Paul R. Dominguez-Gutierrez<sup>1</sup>, Angela Ceribelli<sup>1</sup>, Minoru Satoh<sup>2,3</sup>, Eric S. Sobel<sup>2</sup>, Westley H. Reeves<sup>2</sup> and Edward K.L. Chan<sup>1\*</sup>

<sup>1</sup>Department of Oral Biology, University of Florida, P.O. Box 100424, 1395 Center Drive, Gainesville, FL 32610-0424, USA, <sup>2</sup>Division of Rheumatology and Clinical Immunology, Department of Medicine, <sup>3</sup>Department of Pathology, Immunology, and Laboratory Medicine, University of Florida, P.O. Box 100221, 1600 SW Archer Rd, Gainesville, FL 32610-0221, USA

## **Additional file 1**

### **Figure S1-8**

Figure S1

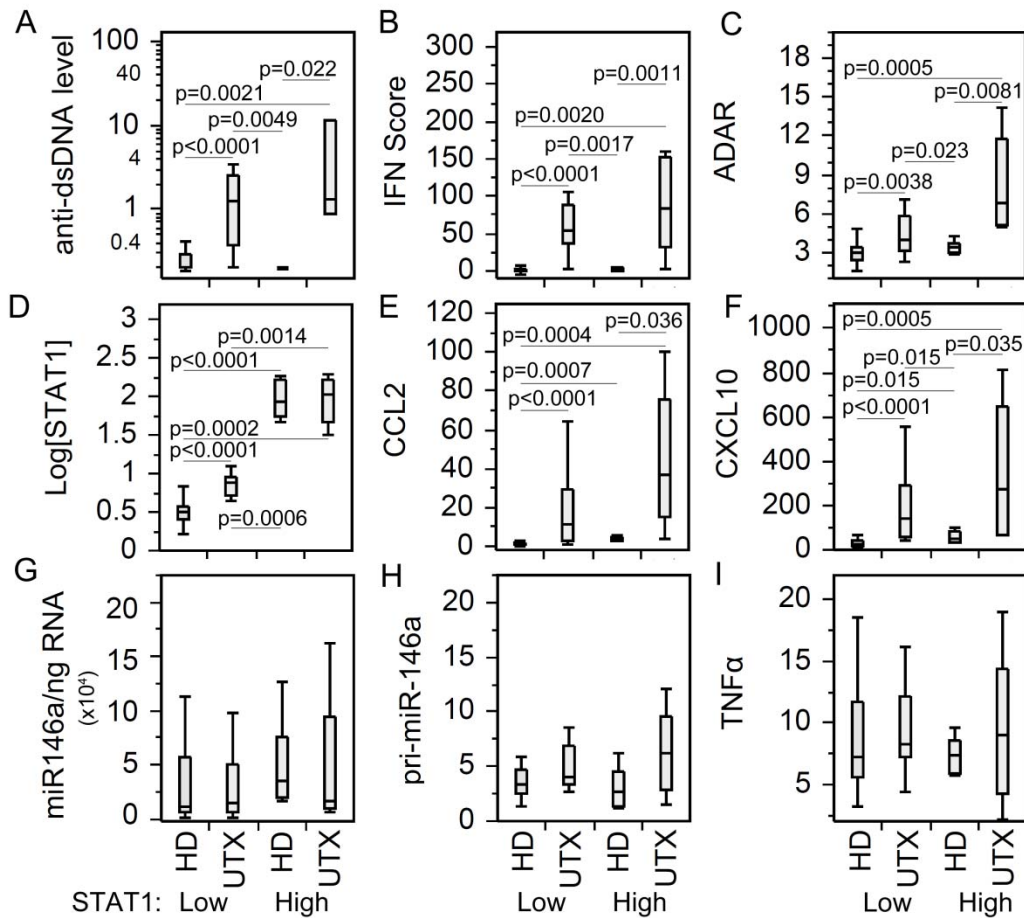

**Expression of different biomarkers in high versus low STAT1 populations in both SLE and healthy donors.** When analyzing different candidate biomarkers, there was no significant difference between high and low STAT1 UTX patients, with the exception of STAT1 (D). Comparing high and low STAT1 HD showed significant difference in STAT1 (D), CCL2 (E), and CXCL10 (F) but no significant difference for anti-dsDNA (A), IFN score (B), ADAR (C), miR-146a (G), pri-miR-146a (H), and TNF $\alpha$  (I). Regardless of STAT1 levels, UTX patients were significantly higher in anti-dsDNA, IFN score, ADAR, STAT1, CCL2, and CXCL10 than HD (A-F). Data are presented in box plot. All groups were compared among each other and only significant *P* values are shown indicating each specific comparison.

Figure S2

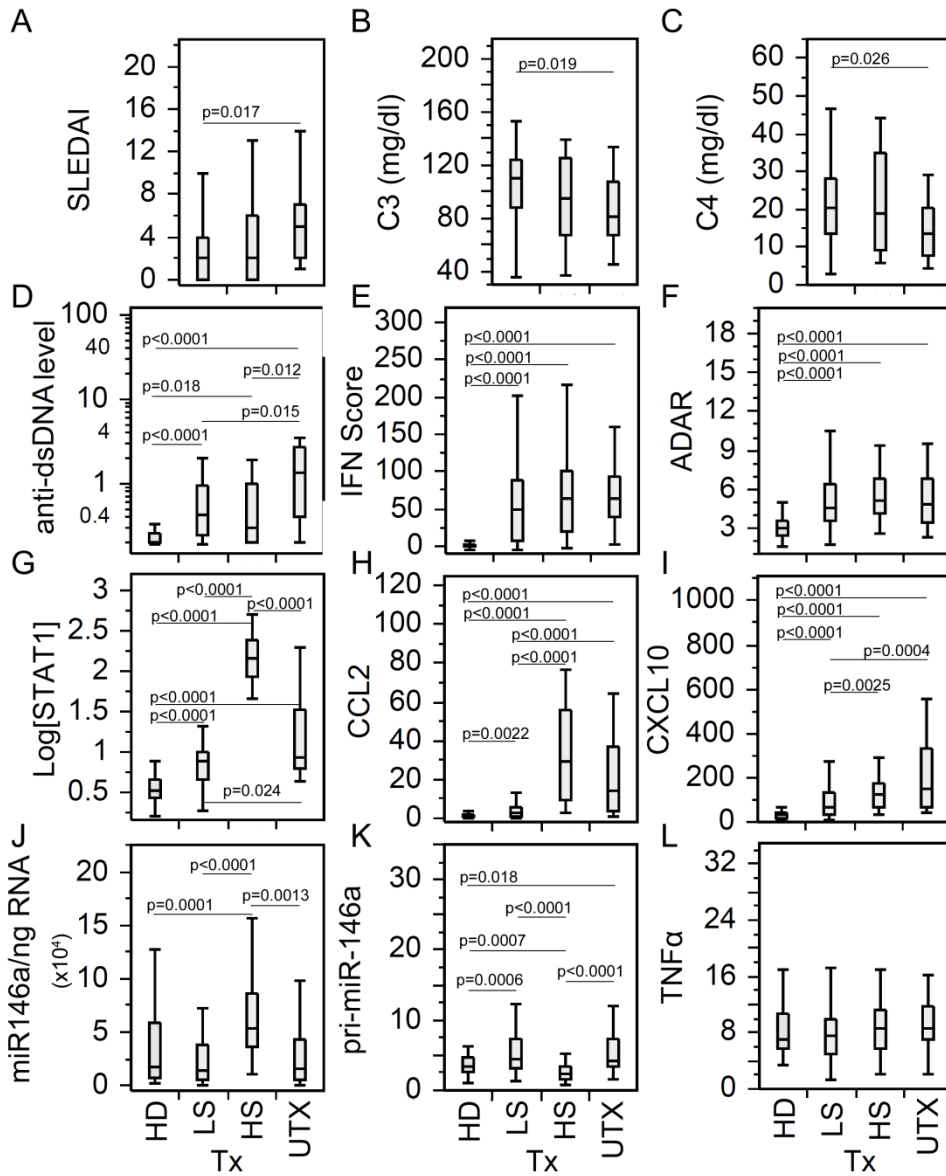

**Comparison of high and low STAT1 subsets of all treated to untreated SLE patient visits.** Data from Figure 1 are replotted to examine significant differences between the high and low STAT1 subsets.

Figure S3

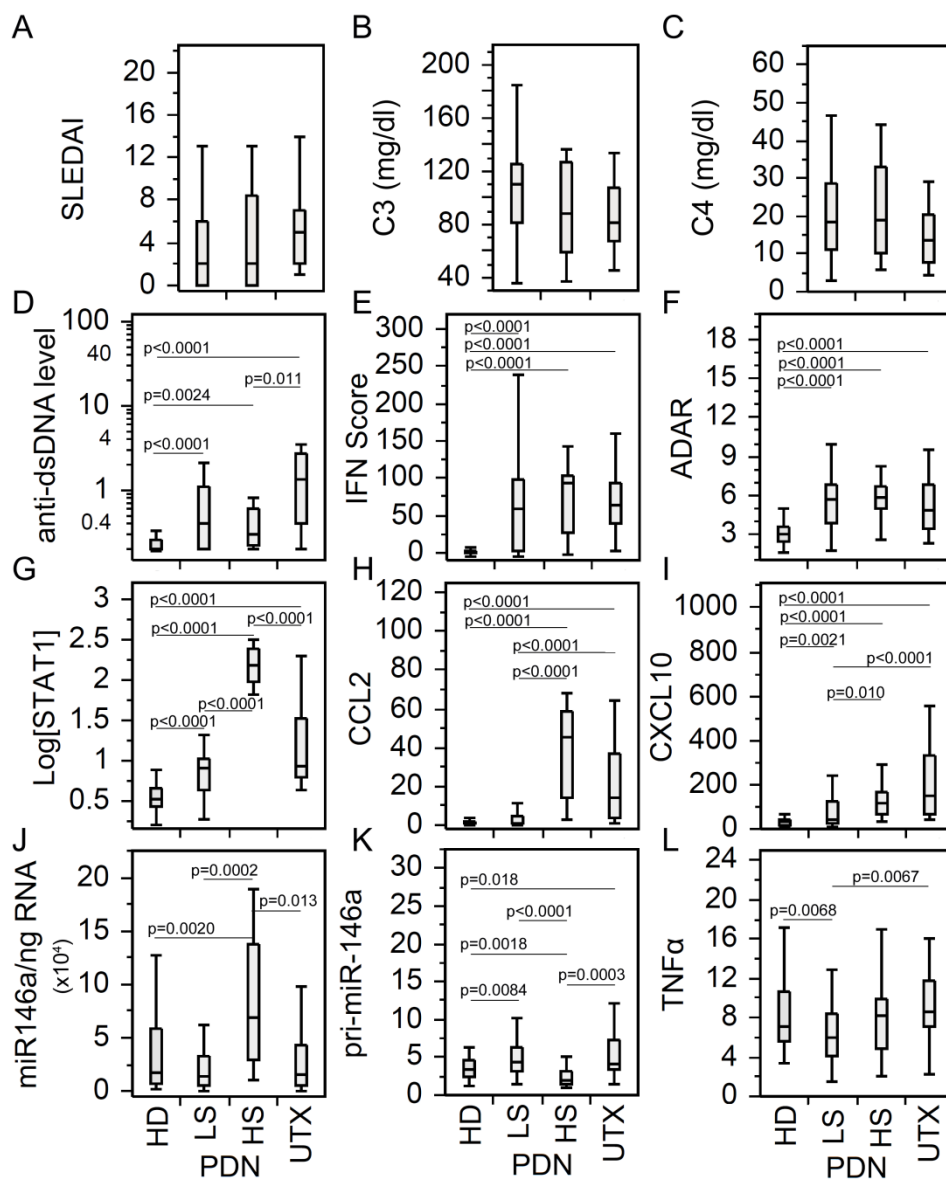

**Comparison of high and low STAT1 subsets of PDN treated patient visits to untreated patient visits.** Data from Figure 2 are replotted to examine significant differences between the high and low STAT1 subsets.

Figure S4

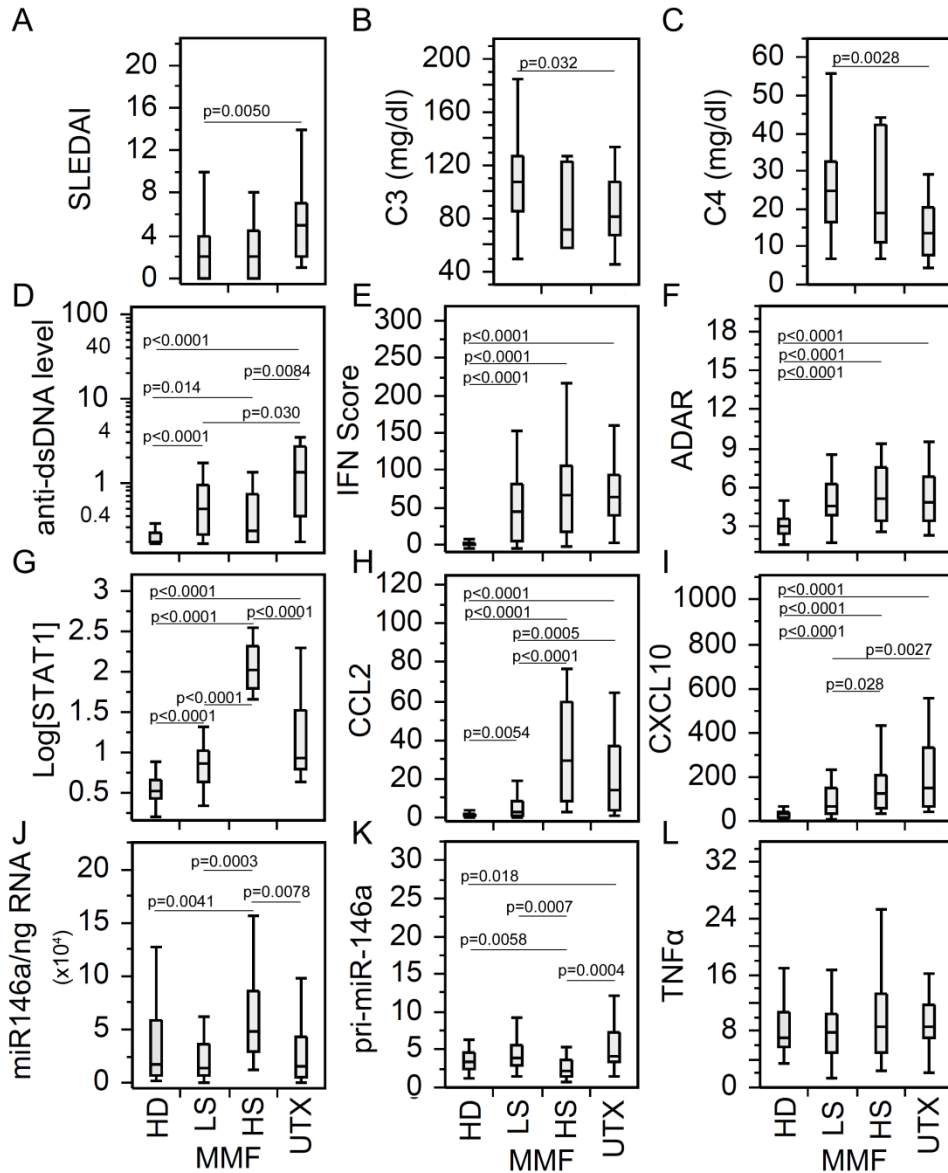

**Comparison of high and low STAT1 subsets of HCQ treated patient visits to untreated patient visits.** Data from Figure 3 are replotted to examine significant differences between the high and low STAT1 subsets.

Figure S5

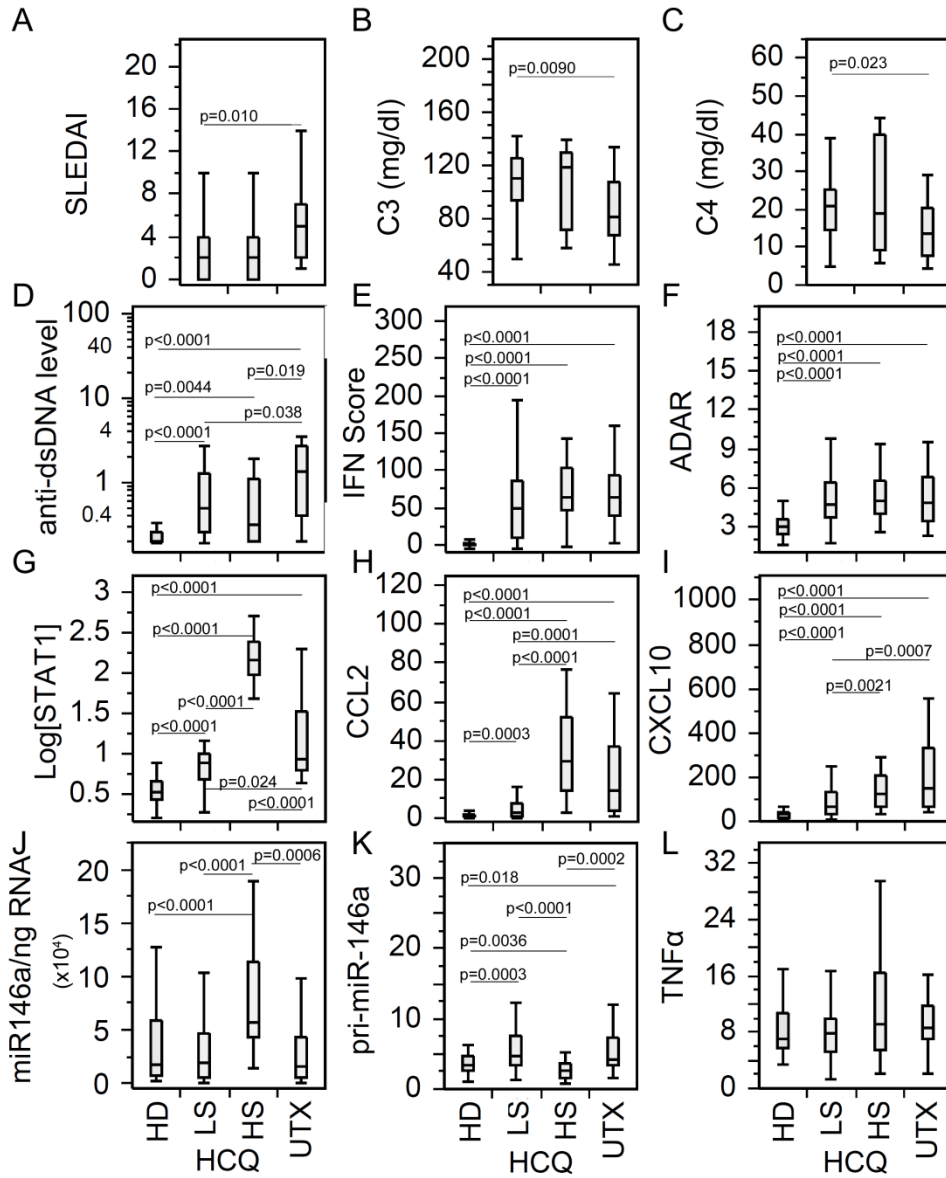

**Comparison of high and low STAT1 subsets of MMF treated patient visits to untreated patient visits.** Data from Figure 4 are replotted to examine significant differences between the high and low STAT1 subsets.



Figure S7

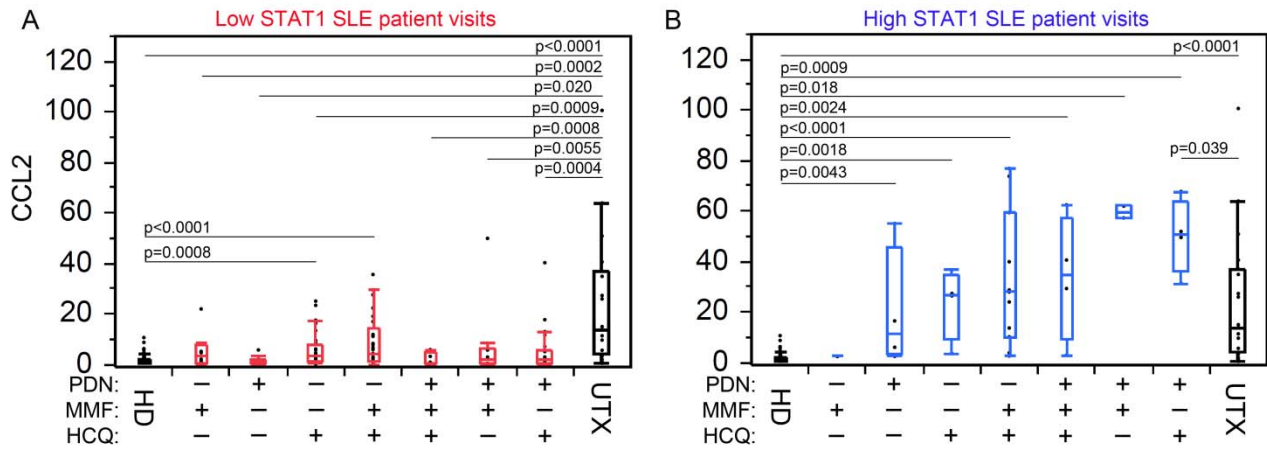

**Separate analyses of high and low STAT1 effects on CCL2 expression in various combined therapies.** Data from Figure 8A are replotted to examine significant differences between the high and low STAT1 subsets.



Figure S8

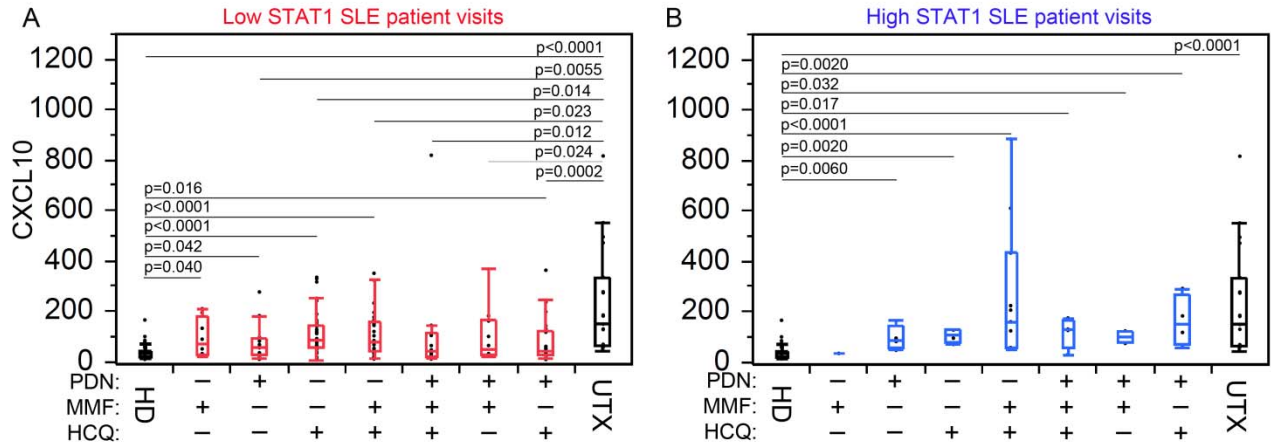

**Separate analyses of high and low STAT1 effects on CXCL10 expression in various combined therapies.** Data from Figure 8B are replotted to examine significant differences between the high and low STAT1 subsets.
